# Supplementary material for: Alterations of gut microbiome and effects of probiotic therapy in patients with liver cirrhosis: A systematic review and meta-analysis
Source: PubMed Central journal article supplement (PMC9794299; doi:10.1097/md.0000000000032335), 2022-12-23
Supplement: medi-101-e32335-s001.pdf [file medi-101-e32335-s001.pdf]

**Supplemental Table 1** Search strategy in meta-analysis

| <b>ID</b> | <b>Search</b>                                                                                                                                                         |
|-----------|-----------------------------------------------------------------------------------------------------------------------------------------------------------------------|
| #1        | Keyword of (Gastrointestinal Microbiome OR gut microbiome OR intestinal microbiota OR Gastrointestinal Flora OR gut flora OR gut microbiota OR intestinal microbiome) |
| #2        | Keyword of (Probiotics)                                                                                                                                               |
| #3        | Keyword of (liver cirrhosis OR Hepatic Cirrhosis OR cirrhosis)                                                                                                        |
| #4        | (#1 AND #3), (#2 AND #3)                                                                                                                                              |

Last update search: August 2022.
